# Supplementary material
Source: publisher figshare collection journal article supplement (https://sage.figshare.com/ndownloader/files/15051254)
Supplement: Supplementary file 1 [file 15051254]

## Supplemental Tables

Supplemental Table S1: Cost comparison between groups

| Comparison of non-image guided vs. US guided | Comparison of non-image guided vs. Fluoroscopy guided | Comparison of US guided vs. Fluoroscopy guided |
|----------------------------------------------|-------------------------------------------------------|------------------------------------------------|
| p<0.01 <sup>T</sup>                          | p=1                                                   | p=1                                            |

<sup>T</sup>Significant cost difference when comparing non-image guided injections versus ultrasound-guided injections.

Supplemental Table S2: Odds Ratio and Probability of Surgical Intervention

| Variable/Comorbidities             | Odds Ratio       | Number of Injections | Probability of Surgery |
|------------------------------------|------------------|----------------------|------------------------|
| More than 1 injection <sup>T</sup> | OR = 1.1 p<0.001 | 1 Injection          | 10.2 %                 |
| Dupuytren's disease <sup>T</sup>   | OR = 2.1 p<0.001 | 2 injections         | 16.2% <sup>Y</sup>     |
| Obesity <sup>T</sup>               | OR = 1.3 p<0.001 | 3 injections         | 19.2% <sup>Y</sup>     |
| Smoking <sup>T</sup>               | OR = 1.5 p<0.001 | 4 Injections         | 18.5% <sup>Y</sup>     |
| Hypothyroidism <sup>T</sup>        | OR = 1.2 p<0.001 | > 4 injections       | 17.6% <sup>Y</sup>     |
| Diabetes                           | OR= 1.0 p = 0.07 |                      |                        |

<sup>T</sup>Denotes the comorbidities that were associated with an increased odds of undergoing surgical intervention of thumb CMC arthritis.

<sup>Y</sup>Have more than 1 injection is associated with significantly increased probability of undergoing surgical intervention.
